# Supplementary material for: Pathophysiological consequences and benefits of HFE mutations: 20 years of research
Source: PubMed Central journal article supplement — Haematologica. 2017 May;102(5):809–17. doi: 10.3324/haematol.2016.160432 (PMC5477599; doi:10.3324/haematol.2016.160432), 2017-05
Supplement: 2016_160432-Disclosures_and_Contributions.pdf [file 2016_160432-Disclosures_and_Contributions.pdf]

Haematologica  
HAEMATOL/2016/160432  
Version 3

Pathophysiological consequences and benefits of HFE mutations - 20  
years of research

Ina Hollerer, André Bachmann, and Martina U. Muckenthaler

Disclosures: none

Contributions: IH performed literature search and wrote the manuscript. AB performed literature search. MUM supervised the study and finalized the manuscript.
